# Supplementary material for: Iron and nitrogen co-doped titania matrix supported Pt for enhanced oxygen reduction activity in polymer electrolyte fuel cells
Source: Royal Society of Chemistry journal article supplement (doi:10.1039/c6ra05119g), 2016-01-01
Supplement: c6ra05119g1.pdf [file c6ra05119g1.pdf]

## Iron and Nitrogen co-doped Titania Matrix Supported Pt for Enhanced Oxygen Reduction Activity in Polymer Electrolyte Fuel Cells

P. Dhanasekaran<sup>a</sup>, S. Vinod Selvaganesh<sup>a</sup>, V.V. Giridhar<sup>a</sup>, Santoshkumar D. Bhat<sup>a,\*</sup>

<sup>a</sup>CSIR-Central Electrochemical Research Institute-Madras Unit, CSIR Madras Complex, Chennai-600 113, India

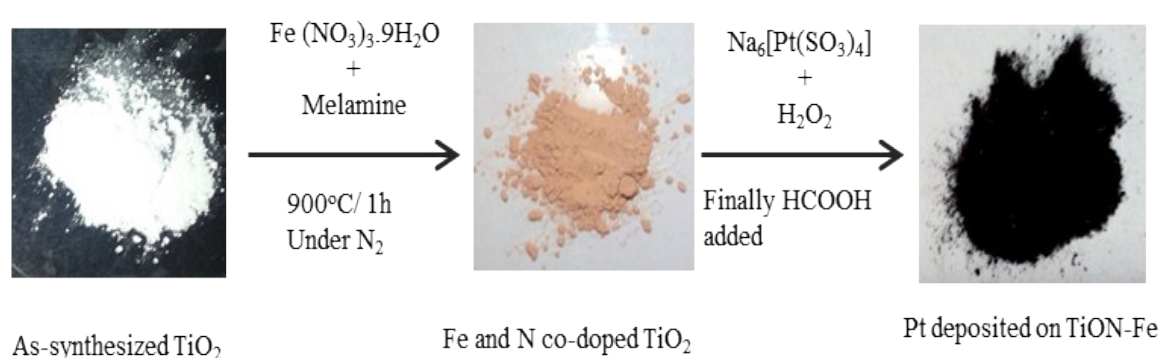

**Fig. 1S:** Various stages with color changes of preparation of TiON-Fe matrix followed by Pt deposition of TiON-Fe matrix by colloidal method.

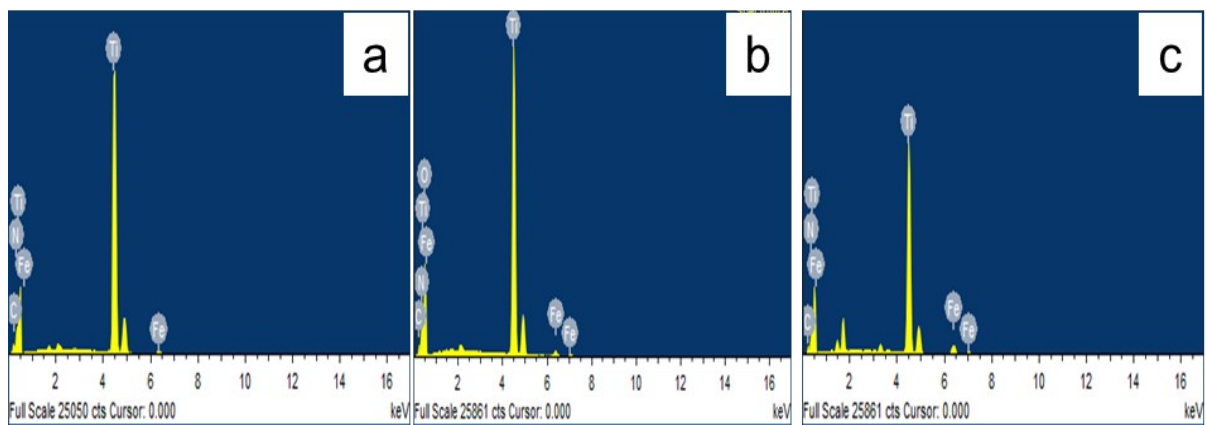

**Fig 2S.** EDX result for (a) TiON-Fe 1, (b) TiON-Fe 3 and (c) TiON-Fe 4 matrix.

**Table:** Shows the XRD refinement data for TiO<sub>2</sub> and Fe and N co-doped TiO<sub>2</sub> matrix comparison.

| Materials           | XRD lattice parameter (Å) |       |       | V (volume) Å <sup>3</sup> |
|---------------------|---------------------------|-------|-------|---------------------------|
|                     | A                         | B     | C     |                           |
| HT-TiO <sub>2</sub> | 4.616                     | 4.616 | 2.951 | 62.38                     |
| TiON-Fe 1           | 4.610                     | 4.610 | 2.956 | 62.40                     |
| TiON-Fe 2           | 4.591                     | 4.591 | 2.961 | 62.41                     |
| TiON-Fe 4           | 4.593                     | 4.593 | 2.961 | 62.41                     |

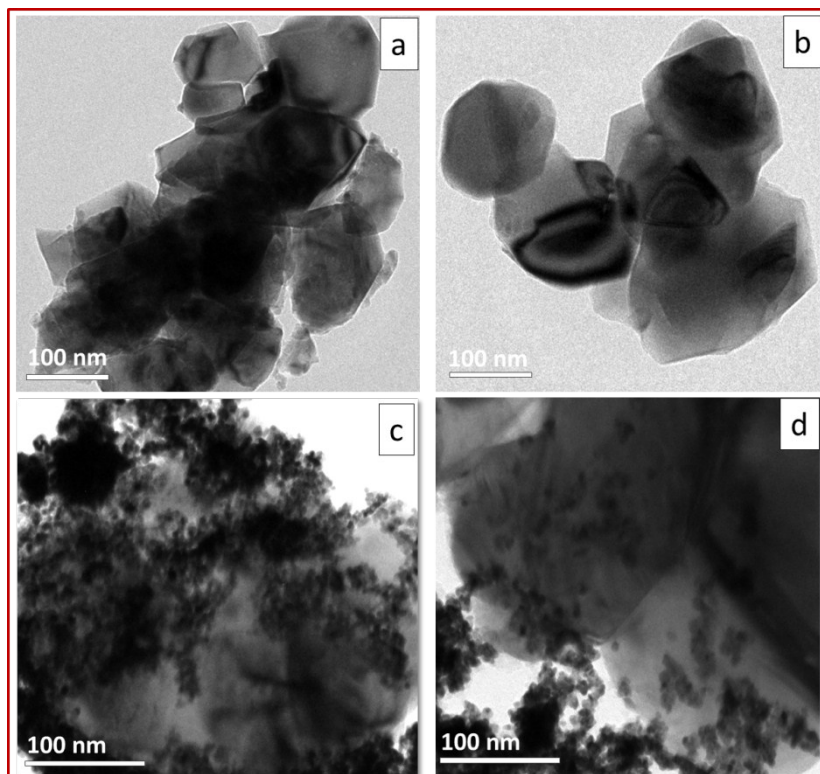

**Fig 3S.** HR-TEM image of (a) TiON-Fe 2, (b) TiON-Fe 5, (c) Pt/TiON-Fe 2 and (d) Pt/TiON-Fe 5 electrocatalysts.

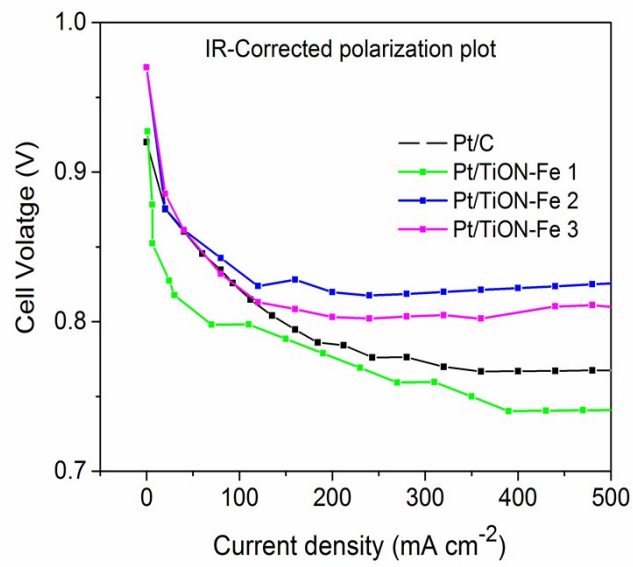

**Fig 4S.** IR-Corrected polarization data of Pt/C and Pt deposited on various content of doped Fe into TiON matrix

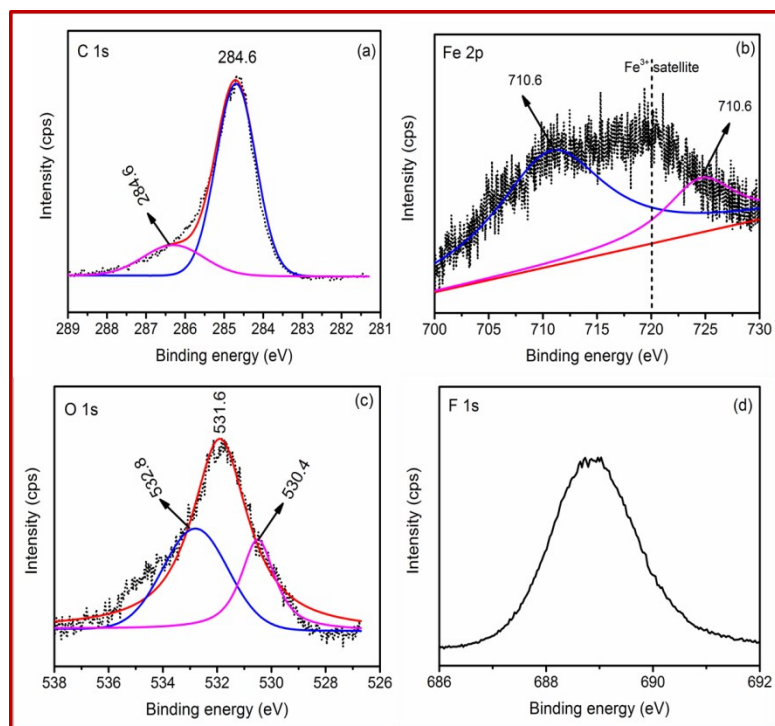

**Fig. 5S** XPS spectrum of after ADT for Pt/TiON-Fe cathode catalyst (a) C 1s, (b) Fe 2p, (c) O 1s and (d) F 1s Fluorine (from Nafion membrane).
